# Supplementary figures and images for: Bio-electrorecycling of carbon dioxide into bioplastics
Source: Royal Society of Chemistry journal article supplement (doi:10.1039/c8gc01771a), 2018-01-01

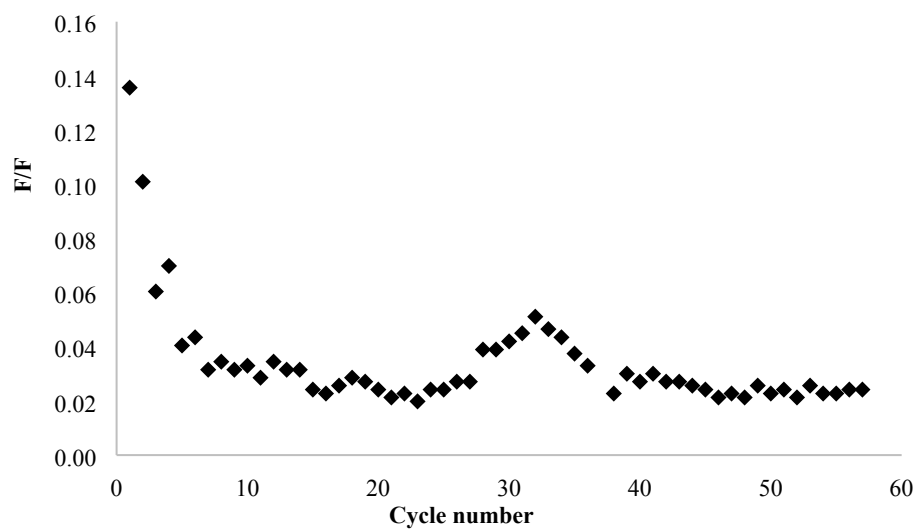

Figure S.1 Feast-famine (F/F) ratio trend during all the PHA storing bacteria selection process.

Supplement: c8gc01771a1.pdf [file c8gc01771a1.pdf]
